# Supplementary material for: 8p23 beta-defensin copy number determination by single-locus pseudogene-based paralog ratio tests risk bias due to low-frequency sequence variations
Source: PubMed Central journal article supplement (PMC3937106; doi:10.1186/1471-2164-15-64), 2014-01-24

**Batch 2**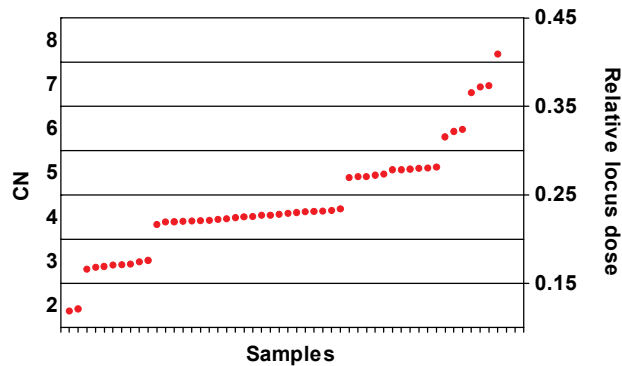

Supplement: 1471-2164-15-64-S3.pdf [file 1471-2164-15-64-S3.pdf]
